# Supplementary material for: ROS enhance angiogenic properties via regulation of NRF2 in tumor endothelial cells
Source: PubMed Central journal article supplement (PMC5542202; doi:10.18632/oncotarget.17567), 2017-05-02
Supplement: oncotarget-08-45484-s001.pdf [file oncotarget-08-45484-s001.pdf]

## ROS enhance angiogenic properties via regulation of NRF2 in tumor endothelial cells

### Supplementary Materials

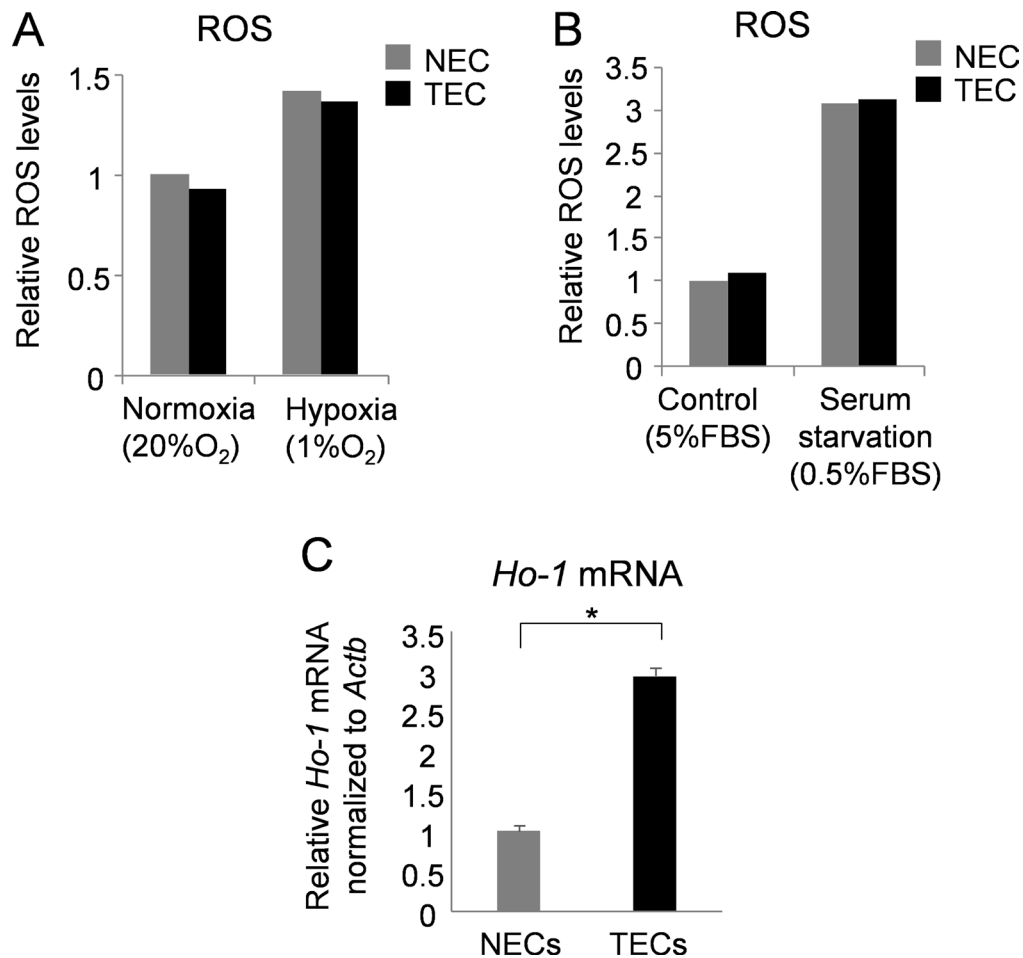

**Supplementary Figure 1:** (A) Relative ROS levels in NECs (gray columns) and TECs (black columns) cultured in normoxia (20% O<sub>2</sub>) or hypoxia (1% O<sub>2</sub>) condition for 24 h. (B) Relative ROS levels in NECs (gray columns) and TECs (black columns) in control (medium with 5% FBS) or starved condition (medium with 0.5% FBS) for 24 h. (C) *Ho-1* mRNA in NECs and TECs were analyzed by real-time PCR. \* $P < 0.01$ , two-sided Student's *t*-test. Data are mean  $\pm$  SD,  $n = 4$  real-time RT-PCR runs.

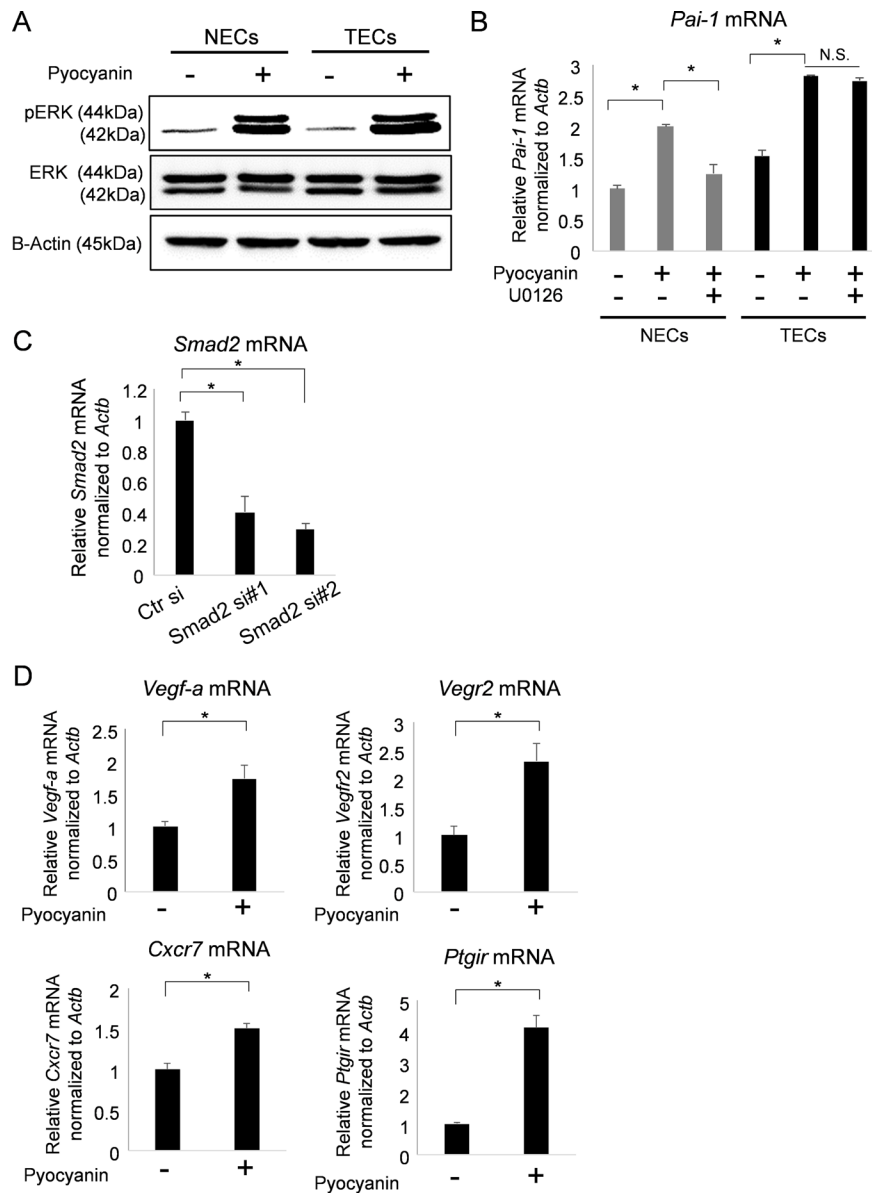

**Supplementary Figure 2:** (A) Phosphorylated ERK1/2 (pERK) and total ERK1/2 (ERK) levels were analyzed in ECs stimulated with or without pyocyanin (25  $\mu$ M) by western blotting. B-Actin served as loading controls. (B) *Pai-1* mRNA in NECs and TECs with or without pyocyanin (25  $\mu$ M) or the MEK inhibitor U0126 (1  $\mu$ M) were analyzed by real-time PCR. \* $P$  < 0.01, N.S., not significant. One-way ANOVA. Data are mean  $\pm$  SD,  $n$  = 4 real-time RT-PCR runs. (C) Real-time PCR confirms silenced *Smad2* mRNA levels. \* $P$  < 0.01, one-way ANOVA. Data are mean  $\pm$  SD,  $n$  = 4 real-time RT-PCR runs. (D) *Vegf-a*, *Vegfr2*, *Cxcr7* and *Ptgir* mRNA expressions in TECs with or without pyocyanin treatment (25  $\mu$ M) were analyzed by real-time PCR. \* $P$  < 0.01, two-sided Student's  $t$ -test. Data are mean  $\pm$  SD,  $n$  = 4 real-time RT-PCR runs.

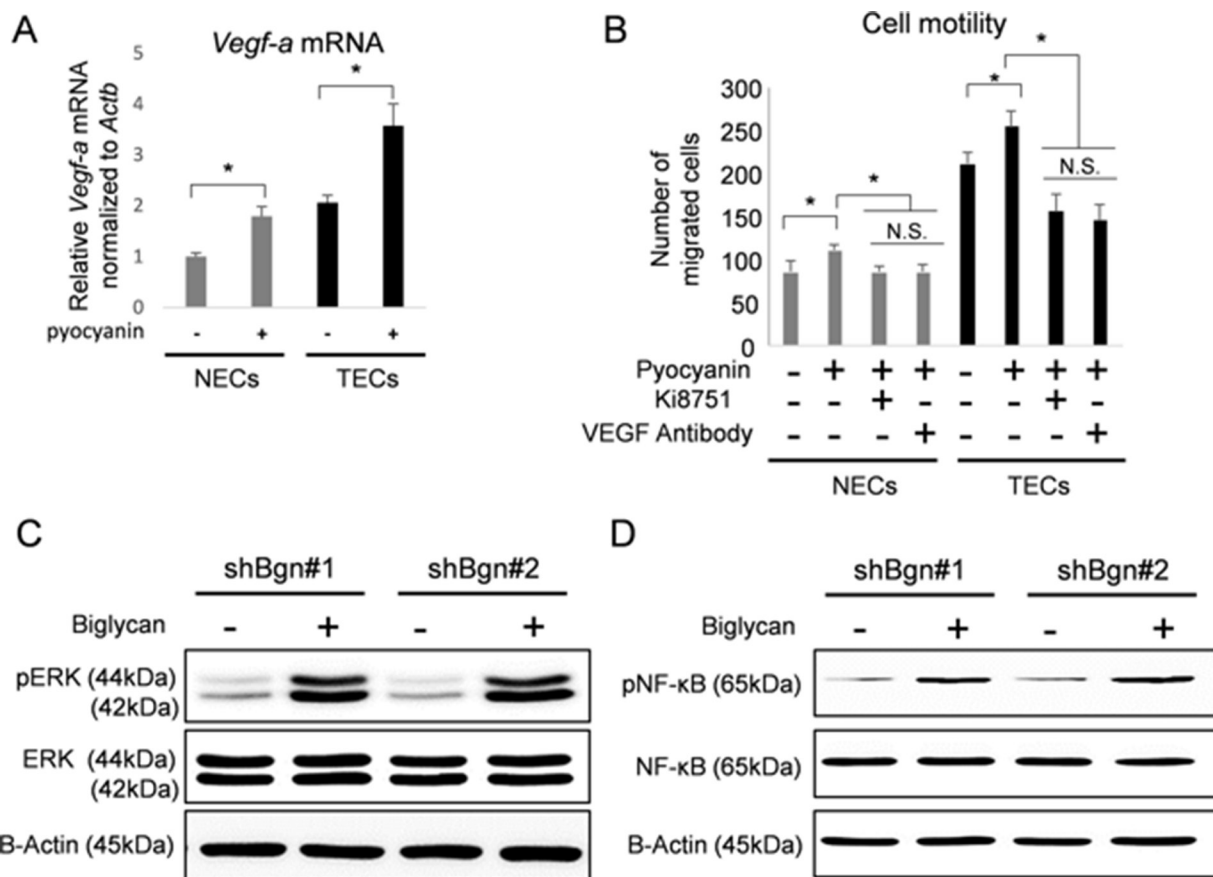

**Supplementary Figure 3:** (A) *Vegf-a* mRNA in NECs and TECs with or without pyocyanin treatment (25  $\mu$ M) were analyzed by real-time PCR.  $*P < 0.01$ . One-way ANOVA. Data are mean  $\pm$  SD,  $n = 4$  real-time RT-PCR runs. (B) Cell motilities of NECs and TECs treated with pyocyanin (25  $\mu$ M) were analyzed by Boyden chamber migration assay in the presence of anti-VEGFA antibody (150ng/ml) or VEGFR2 kinase inhibitor, Ki8751 (10 nM).  $*P < 0.01$ , one-way ANOVA. Data are represented as mean  $\pm$  SD,  $n = 4$  fields. (C) Phosphorylated ERK (pERK) and total ERK (ERK) levels were analyzed in *Biglycan* knockdown TECs stimulated with BGN (1  $\mu$ g/ml) by western blotting. B-Actin served as loading controls. (D) Phosphorylated NF- $\kappa$ B (pNF- $\kappa$ B) and total NF- $\kappa$ B (NF- $\kappa$ B) in *Biglycan* knockdown TECs stimulated with BGN (1  $\mu$ g/ml) by western blotting. B-Actin served as loading controls.
